# Supplementary material for: In Search of Biomarkers to Guide Interventions in Autism Spectrum Disorder: A Systematic Review
Source: Atypon-hosted journal article supplement (doi:10.1176/appi.ajp.21100992), 2022-12-07
Supplement: appi.ajp.21100992.ds001.pdf [file appi.ajp.21100992.ds001.pdf]

## Supplemental Methods

### Literature search

The search was performed on April 2, 2020, on three databases.

*Pubmed/Medline* was searched using the terms:

(PDD OR ASD OR autism\*) AND (biomarker\* OR marker\* OR endophenotype\*)

The entire resulting search was downloaded by clicking 'Send To', selecting 'File', and selecting 'CSV'.

*Embase* was searched using Emtree terms:

(biological marker OR endophenotype OR marker) AND (autism)

In addition, language of article was set to English, and date record added to Embase was set to 01-01-1900 to 29-02-2020. From the search results, all records were selected and the 'Export' button was clicked. Format was selected as 'CSV - Fields by Column' and for output, 'Full Record' was selected.

*Scopus* was searched using the terms:

TITLE-ABS-KEY ( ( pdd OR asd OR autism\* ) AND ( biomarker\* OR marker\* OR endophenotype\* ) ) AND ( LIMIT-TO ( LANGUAGE , "English" ) ) AND ( LIMIT-TO ( DOCTYPE , "ar" ) ) AND ( LIMIT-TO ( SRCTYPE , "j" ) )

There is a 2,000 record limit on downloads, therefore the results were split into three batches using the 'Limit to' filters and selecting independent groups by year. To download, we clicked 'Select all', clicked 'Export', selected 'CSV Export', added 'Pubmed ID' and 'Abstract', and clicked Export. The three batches were combined into a single file using a text editor.

The results from the three searches were merged to identify overlapping records. This task was complicated by differing conventions on capitalization, punctuation, abbreviation, and format. We assessed matching PMIDs, similar year of publication, and Damerau Levenshtein distance of the first seven words of the title (lowercase and stripped of punctuation), the first, second, and last author names and first initial, and the first three letters of each word in the journal name.

## Statistical analysis

Cohen's  $d$  was calculated from the stated  $t$  statistic and samples sizes using the 't2d' function in the 'psych' R library or from the stated mean and standard deviations of cases and controls using the equation:

$$d = \frac{\bar{x}_1 - \bar{x}_2}{s}$$

Where  $\bar{x}_1$  is the mean value from cases,  $\bar{x}_2$  is the mean value from controls, and  $s$  is the pooled standard deviation calculated by:

$$s = \sqrt{\frac{(n_1 - 1)s_1^2 + (n_2 - 1)s_2^2}{(n_1 + n_2 - 2)}}$$

Where,  $n_1$  is the number of cases,  $n_2$  is the number of controls,  $s_1$  is the standard deviation of the cases, and  $s_2$  is the standard deviation of the controls.

To correct for small sample sizes, Hedges'  $g^*$  was estimated from the Cohen's  $d$  value using the equation:

$$g^* = d \left( 1 - \frac{3}{4(n_1 + n_2 - 2) - 1} \right)$$

The confidence intervals of  $g^*$  were estimated by:

$$g^* \pm 1.96 \sqrt{\frac{(n_1 - n_2)}{n_1 n_2} + \frac{g^{*2}}{2(n_1 - n_2)}}$$

Where,  $n_1$  is the number of cases,  $n_2$  is the number of controls.

## Supplemental tables

**\*\*\* Tables S1 and S3–S7 are in separate Excel files. \*\*\***

Table S1. Initial search

Table S3. Interventional studies

Table S4. Non-interventional studies

Table S5. Molecular biomarkers

Table S6. Non-molecular biomarkers

Table S7. Glutathione effect sizes

**Tables S2 and S8 appear below.**

**TABLE S2. PRISMA Checklist**

| Section and Topic             | Item # | Checklist item                                                                                                                                                                                                                                                                                       | Location where item is reported                  |
|-------------------------------|--------|------------------------------------------------------------------------------------------------------------------------------------------------------------------------------------------------------------------------------------------------------------------------------------------------------|--------------------------------------------------|
| <b>TITLE</b>                  |        |                                                                                                                                                                                                                                                                                                      |                                                  |
| Title                         | 1      | Identify the report as a systematic review.                                                                                                                                                                                                                                                          | Title                                            |
| <b>ABSTRACT</b>               |        |                                                                                                                                                                                                                                                                                                      |                                                  |
| Abstract                      | 2      | See the PRISMA 2020 for Abstracts checklist.                                                                                                                                                                                                                                                         | Abstract                                         |
| <b>INTRODUCTION</b>           |        |                                                                                                                                                                                                                                                                                                      |                                                  |
| Rationale                     | 3      | Describe the rationale for the review in the context of existing knowledge.                                                                                                                                                                                                                          | Introduction                                     |
| Objectives                    | 4      | Provide an explicit statement of the objective(s) or question(s) the review addresses.                                                                                                                                                                                                               | Introduction                                     |
| <b>METHODS</b>                |        |                                                                                                                                                                                                                                                                                                      |                                                  |
| Eligibility criteria          | 5      | Specify the inclusion and exclusion criteria for the review and how studies were grouped for the syntheses.                                                                                                                                                                                          | Methods and Fig. 1                               |
| Information sources           | 6      | Specify all databases, registers, websites, organisations, reference lists and other sources searched or consulted to identify studies. Specify the date when each source was last searched or consulted.                                                                                            | Methods, Fig. 1, and Supplementary methods       |
| Search strategy               | 7      | Present the full search strategies for all databases, registers and websites, including any filters and limits used.                                                                                                                                                                                 | Supplementary methods and Supplementary Table S1 |
| Selection process             | 8      | Specify the methods used to decide whether a study met the inclusion criteria of the review, including how many reviewers screened each record and each report retrieved, whether they worked independently, and if applicable, details of automation tools used in the process.                     | Methods and Fig. 1                               |
| Data collection process       | 9      | Specify the methods used to collect data from reports, including how many reviewers collected data from each report, whether they worked independently, any processes for obtaining or confirming data from study investigators, and if applicable, details of automation tools used in the process. | Methods                                          |
| Data items                    | 10a    | List and define all outcomes for which data were sought. Specify whether all results that were compatible with each outcome domain in each study were sought (e.g. for all measures, time points, analyses), and if not, the methods used to decide which results to collect.                        | Methods                                          |
|                               | 10b    | List and define all other variables for which data were sought (e.g. participant and intervention characteristics, funding sources). Describe any assumptions made about any missing or unclear information.                                                                                         | Methods                                          |
| Study risk of bias assessment | 11     | Specify the methods used to assess risk of bias in the included studies, including details of the tool(s) used, how many reviewers assessed each study and whether they worked independently, and if applicable, details of automation tools used in the process.                                    | Methods                                          |
| Effect measures               | 12     | Specify for each outcome the effect measure(s) (e.g. risk ratio, mean difference) used in the synthesis or presentation of results.                                                                                                                                                                  | Methods and Fig. 3                               |

*Continued*

| Section and Topic         | Item # | Checklist item                                                                                                                                                                                                                                              | Location where item is reported            |
|---------------------------|--------|-------------------------------------------------------------------------------------------------------------------------------------------------------------------------------------------------------------------------------------------------------------|--------------------------------------------|
| Synthesis methods         | 13a    | Describe the processes used to decide which studies were eligible for each synthesis (e.g. tabulating the study intervention characteristics and comparing against the planned groups for each synthesis (item #5)).                                        | Methods                                    |
|                           | 13b    | Describe any methods required to prepare the data for presentation or synthesis, such as handling of missing summary statistics, or data conversions.                                                                                                       | Methods and Supplementary methods          |
|                           | 13c    | Describe any methods used to tabulate or visually display results of individual studies and syntheses.                                                                                                                                                      | Methods, Fig. 3, and Supplementary methods |
|                           | 13d    | Describe any methods used to synthesize results and provide a rationale for the choice(s). If meta-analysis was performed, describe the model(s), method(s) to identify the presence and extent of statistical heterogeneity, and software package(s) used. | Methods                                    |
|                           | 13e    | Describe any methods used to explore possible causes of heterogeneity among study results (e.g. subgroup analysis, meta-regression).                                                                                                                        | Methods                                    |
|                           | 13f    | Describe any sensitivity analyses conducted to assess robustness of the synthesized results.                                                                                                                                                                | Methods, Results, Fig. 2                   |
| Reporting bias assessment | 14     | Describe any methods used to assess risk of bias due to missing results in a synthesis (arising from reporting biases).                                                                                                                                     | Methods, Fig. 3, and Supplementary methods |
| Certainty assessment      | 15     | Describe any methods used to assess certainty (or confidence) in the body of evidence for an outcome.                                                                                                                                                       | Methods, Fig. 3, and Supplementary methods |
| <b>RESULTS</b>            |        |                                                                                                                                                                                                                                                             |                                            |
| Study selection           | 16a    | Describe the results of the search and selection process, from the number of records identified in the search to the number of studies included in the review, ideally using a flow diagram.                                                                | Methods and Fig. 1                         |
|                           | 16b    | Cite studies that might appear to meet the inclusion criteria, but which were excluded, and explain why they were excluded.                                                                                                                                 | Supplementary Table S1                     |
| Study characteristics     | 17     | Cite each included study and present its characteristics.                                                                                                                                                                                                   | Supplementary Table S1, S2, and S3         |
| Risk of bias in studies   | 18     | Present assessments of risk of bias for each included study.                                                                                                                                                                                                | NA                                         |

*Continued*

| Section and Topic             | Item # | Checklist item                                                                                                                                                                                                                                                                       | Location where item is reported                                                                                       |
|-------------------------------|--------|--------------------------------------------------------------------------------------------------------------------------------------------------------------------------------------------------------------------------------------------------------------------------------------|-----------------------------------------------------------------------------------------------------------------------|
| Results of individual studies | 19     | For all outcomes, present, for each study: (a) summary statistics for each group (where appropriate) and (b) an effect estimate and its precision (e.g. confidence/credible interval), ideally using structured tables or plots.                                                     | Data analysis and statistical methods, Fig. 3, Supplementary methods, and Supplementary Table S6                      |
| Results of syntheses          | 20a    | For each synthesis, briefly summarise the characteristics and risk of bias among contributing studies.                                                                                                                                                                               | Methods                                                                                                               |
|                               | 20b    | Present results of all statistical syntheses conducted. If meta-analysis was done, present for each the summary estimate and its precision (e.g. confidence/credible interval) and measures of statistical heterogeneity. If comparing groups, describe the direction of the effect. | Data analysis and statistical methods, Fig. 3, Supplementary methods, and Supplementary Table S6                      |
|                               | 20c    | Present results of all investigations of possible causes of heterogeneity among study results.                                                                                                                                                                                       | NA                                                                                                                    |
|                               | 20d    | Present results of all sensitivity analyses conducted to assess the robustness of the synthesized results.                                                                                                                                                                           | Data analysis and statistical methods, Fig. 3                                                                         |
| Reporting biases              | 21     | Present assessments of risk of bias due to missing results (arising from reporting biases) for each synthesis assessed.                                                                                                                                                              | NA                                                                                                                    |
| Certainty of evidence         | 22     | Present assessments of certainty (or confidence) in the body of evidence for each outcome assessed.                                                                                                                                                                                  | Methods, Data analysis and statistical methods, Fig. 3, Supplementary methods, Supplementary Table S6, and discussion |
| <b>DISCUSSION</b>             |        |                                                                                                                                                                                                                                                                                      |                                                                                                                       |
| Discussion                    | 23a    | Provide a general interpretation of the results in the context of other evidence.                                                                                                                                                                                                    | Discussion                                                                                                            |
|                               | 23b    | Discuss any limitations of the evidence included in the review.                                                                                                                                                                                                                      | Discussion                                                                                                            |
|                               | 23c    | Discuss any limitations of the review processes used.                                                                                                                                                                                                                                | Discussion                                                                                                            |
|                               | 23d    | Discuss implications of the results for practice, policy, and future research.                                                                                                                                                                                                       | Discussion                                                                                                            |

*Continued*

| Section and Topic                              | Item # | Checklist item                                                                                                                                                                                                                             | Location where item is reported                |
|------------------------------------------------|--------|--------------------------------------------------------------------------------------------------------------------------------------------------------------------------------------------------------------------------------------------|------------------------------------------------|
| <b>OTHER INFORMATION</b>                       |        |                                                                                                                                                                                                                                            |                                                |
| Registration and protocol                      | 24a    | Provide registration information for the review, including register name and registration number, or state that the review was not registered.                                                                                             | Methods                                        |
|                                                | 24b    | Indicate where the review protocol can be accessed, or state that a protocol was not prepared.                                                                                                                                             | NA                                             |
|                                                | 24c    | Describe and explain any amendments to information provided at registration or in the protocol.                                                                                                                                            | NA                                             |
| Support                                        | 25     | Describe sources of financial or non-financial support for the review, and the role of the funders or sponsors in the review.                                                                                                              | Acknowledgements                               |
| Competing interests                            | 26     | Declare any competing interests of review authors.                                                                                                                                                                                         | Conflicts of Interest                          |
| Availability of data, code and other materials | 27     | Report which of the following are publicly available and where they can be found: template data collection forms; data extracted from included studies; data used for all analyses; analytic code; any other materials used in the review. | Supplementary Tables and Supplementary Methods |

**TABLE S8. Most cited biomarkers in animal interventional studies<sup>a</sup>**

| BM               | Reference                 | Modality           | Animal Model | Intervention                   | Age (postnatal days) | Biomarker Outcome | ASD Behavior Measures          | Behavioral Improvement | Biomarker x Behavior Correlation | PMID     |
|------------------|---------------------------|--------------------|--------------|--------------------------------|----------------------|-------------------|--------------------------------|------------------------|----------------------------------|----------|
| <b>GSH</b>       | Sandhya et al., 2012      | Brain              | VPA          | Bacopa monniera                | 30–40                | Post > Pre        | Social behavior                | Yes                    | Not tested                       | 22322665 |
|                  | Pragnya et al., 2014      | Brain              | VPA          | Bacopa monniera                | 13–40                | Not different     | Social behavior                | Yes                    | Not tested                       | 24803211 |
|                  | Al-Amin et al., 2015      | Brain              | VPA          | Bacopa monniera                | 26–55                | Post > Pre        | Social behavior                | Yes                    | Not tested                       | 25732953 |
|                  | Rani et al., 2017         | Brain              | Terbutaline  | Minocycline and doxycycline    | 15–29                | Post > Pre        | Nociception                    | Yes                    | Not tested                       | 29074392 |
| <b>IL-6</b>      | Hsiao et al., 2013        | Colon              | MIA          | Bacteroides fragilis           | 21-42                | Not different     | Social behavior                | Yes                    | No                               | 24315484 |
|                  | Kirsten et al., 2018      | Plasma             | LPS          | Pioglitazone                   | 21-29                | Pre > Post        | Play, ultrasonic vocalizations | Yes                    | No                               | 29791472 |
| <b>BDNF</b>      | Segal-Gavish et al., 2015 | Brain, hippocampus | BTBR         | Human mesenchymal stem cells   | 42-64                | Post > Pre        | Stereotyped behavior           | Yes                    | Not tested                       | 26257137 |
|                  | Kirsten et al., 2019      | Plasma             | LPA          | Pioglitazone                   | 21-29                | Pre > Post        | Cognitive inflexibility        | Yes                    | No                               | 31036753 |
| <b>Serotonin</b> | Sandhya et al., 2012      | Brain, hippocampus | VPA          | Bacopa monniera                | 21-35                | Not different     | Social behavior                | Yes                    | Not tested                       | 22322665 |
|                  | Hsiao et al., 2013        | Colon              | MIA          | Bacteroides fragilis           | 21-42                | Pre > Post        | Social behavior                | Yes                    | Not tested                       | 24315484 |
|                  | Pragnya et al., 2014      | Brain, hippocampus | VPA          | Piperine                       | 13                   | Post > Pre        | Social behavior                | Yes                    | Not tested                       | 24803211 |
|                  | Zhang et al., 2015        | Brain              | BTBR         | Tryptophan depletion           | 90-120               | Pre > Post        | Social behavior                | No                     | No                               | 25445490 |
|                  | Zhang et al., 2015        | Brain              | BTBR         | Tryptophan addition            | 90-120               | Post > Pre        | Social behavior                | Yes                    | No                               | 25445490 |
|                  | Tanaka et al., 2018       | Brain, striatum    | SERT         | Tryptophan-free diet           | 90-180               | Pre > Post        | Social behavior                | Yes                    | Not tested                       | 30498565 |
| <b>Oxytocin</b>  | Pujol et al., 2018        | Brain, RNA         | MOR          | Behavioral reward intervention | 49-70                | Post > Pre        | Social behavior                | Yes                    | Not tested                       | 30242222 |
|                  | Kirsten et al., 2019      | Plasma             | LPA          | Pioglitazone                   | 21-29                | Not different     | Social behavior                | Yes                    | Not tested                       | 31036753 |

<sup>a</sup> BDNF=brain-derived neurotrophic factor; BM=biomarker; BTBR=Black and Tan Brachyury (T1tf/J); GSH=glutathione; IL-6=interleukin-6; LPA=lysophosphatidic acid; LPS=lipopolysaccharide; MIA=maternal immune activation; MOR=mu-opioid receptor (Oprm1-/-) knock-out; PMID=PubMed reference number; RNA=ribonucleic acid; SERT=serotonin transporter knock-out; VPA=valproic acid.
